# Supplementary material for: Understanding and Measuring the Wellbeing of Carers of People With Dementia
Source: PubMed Central journal article supplement — Gerontologist. 2018 Mar 16;59(5):e552–64. doi: 10.1093/geront/gny018 (PMC6857741; doi:10.1093/geront/gny018), 2018-03-16
Supplement: gny018_suppl_supplementary_appendix_7.pdf [file gny018_suppl_supplementary_appendix_7.pdf]

## Appendix 7: Excluded Reviews

| Author(s)                                                                                                                                                                                                                                                                                                                                                    | Topic                                                                                               | Reason for Rejection                                                          |
|--------------------------------------------------------------------------------------------------------------------------------------------------------------------------------------------------------------------------------------------------------------------------------------------------------------------------------------------------------------|-----------------------------------------------------------------------------------------------------|-------------------------------------------------------------------------------|
| <p>Crellin, N., Orrell, M., McDermott, O., &amp; Charlesworth, G. (2014). Self-efficacy and health-related quality of life in family caregivers of people with dementia: a systematic review. <i>Aging &amp; Mental Health</i>, 18, 954-969. DOI: 10.1080/13607863.2014.915921</p>                                                                           | <p>Self-efficacy and health related quality of life for family carers of people with dementia</p>   | <p>Focus on Quality of Life, not wellbeing</p>                                |
| <p>Elvish, R., Lever, S., Johnstone, J., Cawley, R., &amp; Keady, J. (2012). Psychological interventions for carers of people with dementia: a systematic review of quantitative and qualitative evidence. From <a href="http://www.bacp.co.uk/docs/pdf/9346_dementia.pdf">http://www.bacp.co.uk/docs/pdf/9346_dementia.pdf</a> (accessed 10 July 2017).</p> | <p>Psychological interventions for carers of people with dementia</p>                               | <p>No clear focus on wellbeing</p>                                            |
| <p>Farina, N., Page, T., Daley, S., Brown, A., Bowling, A., Basset, T., Livingston, G., Knapp, M., Murray, J., &amp; Banerjee, S. (2017). Factors associated with the quality of life of family carers of people with dementia: A systematic review. <i>Alzheimer's &amp; Dementia</i>, 10. DOI: 10.1016/j.jalz.2016.12.010</p>                              | <p>Quality of life for carers of people with dementia</p>                                           | <p>Focus on Quality of Life, not wellbeing</p>                                |
| <p>Greenwood, N., Pelone, F., &amp; Hassenkamp, A. (2016). General practice based psychosocial interventions for supporting carers of people with dementia or stroke: a systematic review. <i>BMC Family Practice</i>, 17. DOI: 10.1186/s12875-015-0399-2</p>                                                                                                | <p>General Practice based interventions for supporting carers of people with dementia or stroke</p> | <p>Focus on the General Practice environment. No clear focus on wellbeing</p> |

Lins, S., Hayder-Beichel, D., Rucker, G., Motschall, E., Antes, G., Meyer, G., & Langer, G. (2014). Efficacy and experiences of telephone counselling for informal carers of people with dementia. *Cochrane Database of Systematic Reviews*, 9. DOI: 10.1002/14651858

Telephone counselling for informal carers of people with dementia

Lacking a clear focus and discussion on the wellbeing of carers

Maayan, N., Soares-Weiser, K., & Lee, H. (2014). Respite care for people with dementia and their carers. *Cochrane Database of Systematic Reviews*, 1. DOI: 10.1002/14651858.cd004396.pub3

Respite care for people with dementia and their carers

Discussion of caregiver burden and quality of life, but no specific discussion of wellbeing

Richardson, A., Pedley, G., Pelone, F., Akhtar, F., Chang, J., Muleya, W., & Greenwood, N. (2016). Psychosocial interventions for people with young onset dementia and their carers: a systematic review. *International Psychogeriatrics*, 28(9), 1441-1454. DOI: 10.1017/S1041610216000132

Psychosocial interventions for people and carers effected by young onset dementia

Specific focus on young people, part of exclusion criteria (under 18)

Vandepitte, S., Van Den Noortgate, N., Putman, K., Verhaeghe, S., Verdonck, C., & Annemans, L. (2016). Effectiveness of respite care in supporting informal caregivers of persons with dementia: a systematic review. *International Journal of Geriatric Psychiatry*, 31, 1277-1288. DOI: 10.1002/gps.4504.

Effectiveness of repite care in supporting carers of people with dementia

No clear focus on wellbeing, main topic is respite care

Wilson, S., Toye, C., Aoun, S., Slatyer, S., Moyle, W., & Beattie, E. (2017). Effectiveness of psychosocial interventions in reducing grief experienced by family carers of people with dementia: a systematic review. *JBI Database of Systematic Reviews and Implementation Reports*, 15, 809-839. DOI: 10.111124/jbisrir-2016-00301

Psychosocial interventions effectiveness in reducing carer grief

No clear focus on wellbeing. Does consider grief and loss
